# Supplementary material
Source: HighWire-hosted journal article supplement (https://bmjopen.bmj.com/content/8/2/e018951)

## ONLINE SUPPLEMENTARY MATERIALS

**Online supplementary table 1. Hypothetical worse performance and costs of mechanical thrombectomy, ICER (CNY/QALY)**

| <b>Additional cost of mechanical thrombectomy</b> | <b>Outcome of mechanical thrombectomy</b> |                                |                                      |
|---------------------------------------------------|-------------------------------------------|--------------------------------|--------------------------------------|
|                                                   | <b>Base Case (OR=2.046)*</b>              | <b>Unfavourable (OR=1.745)</b> | <b>Worse unfavourable (OR=1.692)</b> |
| +10%, CNY 66903                                   | 69,421                                    | 90,340                         | 95,839                               |
| Base case, CNY 60821                              | 63,010                                    | 82,120                         | 87,123                               |
| -10%, CNY 54739                                   | 56,612                                    | 73,883                         | 78,425                               |
| -25%, CNY 45616                                   | 47,003                                    | 61,553                         | 65,360                               |
| -50%, CNY 30410                                   | 30,995                                    | 40,987                         | 43,596                               |

ICER, incremental cost-effectiveness ratio; QALY, quality-adjusted life-year; OR, Odds ratio.

\* OR: OR of modified Rankin Scale 0-2 at day 90 for mechanical thrombectomy.

**Online supplementary table 2. Distributions and parameters used in model inputs**

| <b>Model Input</b>                                      | <b>Distribution</b> | $\alpha$ | $\beta$ | <b>mean</b> | <b>standard error</b> |
|---------------------------------------------------------|---------------------|----------|---------|-------------|-----------------------|
| <b>Efficacy and safety outcome inputs</b>               |                     |          |         |             |                       |
| Proportion of outcomes at 90 days in IV tPA group       |                     |          |         |             |                       |
| mRS 0-2                                                 | beta                | 60.7     | 126.0   |             |                       |
| Death (mRS 6)                                           | beta                | 65.7     | 325.5   |             |                       |
| sICH                                                    | beta                | 13.5     | 218.7   |             |                       |
| Odds ratio at 90 days                                   |                     |          |         |             |                       |
| mRS 0-2                                                 | lognormal*          |          |         | 2.046       | 0.097                 |
| Death (mRS 6)                                           | lognormal*          |          |         | 0.871       | 0.123                 |
| sICH                                                    | lognormal*          |          |         | 0.965       | 0.190                 |
| <b>Probabilities inputs</b>                             |                     |          |         |             |                       |
| Proportion of patients received mechanical thrombectomy | beta                | 817.0    | 131.9   |             |                       |
| Proportion of patients arrived within 4.5 hours         | beta                | 1817.2   | 310.7   |             |                       |
| Recurrent rate of stroke (per patient year)             |                     |          |         |             |                       |
| mRS 0-2                                                 | beta                | 833.0    | 7286.0  |             |                       |
| mRS 3-5                                                 | beta                | 496.8    | 3006.6  |             |                       |
| Relative risk of stroke recurrence per life year        | lognormal*          |          |         | 1.03        | 0.005                 |
| Death with recurrent stroke                             | beta                | 290.9    | 1093.7  |             |                       |
| Hazard ratio of non-stroke death for mRS 3-5            | lognormal*          |          |         | 1.78        | 0.103                 |
| <b>Cost inputs (2013 Chinese Yuan Renminbi)</b>         |                     |          |         |             |                       |
| Additional costs of mechanical thrombectomy             | lognormal           |          |         | 60821       | 4594                  |
| Additional costs of IV tPA treatment                    | lognormal           |          |         | 11179       | 325                   |
| Additional costs of sICH                                | lognormal           |          |         | 2374        | 65                    |
| One-time hospitalisation costs                          |                     |          |         |             |                       |
| mRS 0-2                                                 | lognormal           |          |         | 10055       | 76                    |
| mRS 3-5                                                 | lognormal           |          |         | 13729       | 155                   |
| mRS 6                                                   | lognormal           |          |         | 11121       | 475                   |
| Annual post-hospitalisation costs                       |                     |          |         |             |                       |
| mRS 0-2                                                 | lognormal           |          |         | 7385        | 118                   |
| mRS 3-5                                                 | lognormal           |          |         | 11350       | 323                   |
| <b>Utility inputs</b>                                   |                     |          |         |             |                       |
| mRS 0-2                                                 | beta                | 125.3    | 39.6    |             |                       |
| mRS 3-5                                                 | beta                | 65.9     | 247.8   |             |                       |
| Recurrent stroke                                        | beta                | 732.4    | 1421.7  |             |                       |
| sICH                                                    | beta                | 21.3     | 4.1     |             |                       |
| <b>Discount rate inputs</b>                             |                     |          |         |             |                       |
| Costs                                                   | beta                | 5.3      | 172.5   |             |                       |
| Outcomes                                                | beta                | 93.1     | 3011.2  |             |                       |

IV tPA, intravenous tissue plasminogen activator; mRS, modified Rankin Scale; sICH, symptomatic intracerebral haemorrhage.

\*Correction is implemented in the Ersatz function  $ErRelativeRisk(RR, SE[\ln(RR)])$ .

**Online supplementary figure 1.** Cost-effectiveness acceptability curve. The curve presents the probability that mechanical thrombectomy within 6 hours to be cost-effective against willingness-to-pay threshold. The solid line represents the willingness-to-pay threshold of CNY 125,700 per QALY. The dashed line represents CNY 41,900 per QALY.

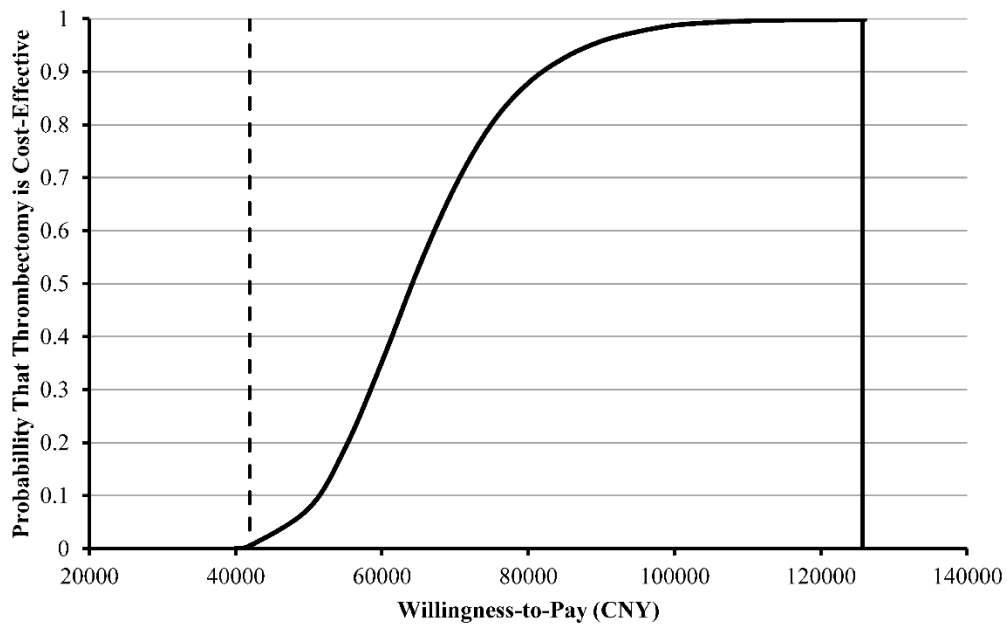

Supplement: inline-supplementary-material-1 [file inline-supplementary-material-1.pdf]
